# Supplementary material for: Signaling Pathway Alterations Driven by BRCA1 and BRCA2 Germline Mutations are Sufficient to Initiate Breast Tumorigenesis by the PIK3CAH1047R Oncogene
Source: PubMed Central journal article supplement (PMC10774565; doi:10.1158/2767-9764.crc-23-0330), 2024-01-05
Supplement: crc-23-0330-s01.pdf [file crc-23-0330-s01.pdf]

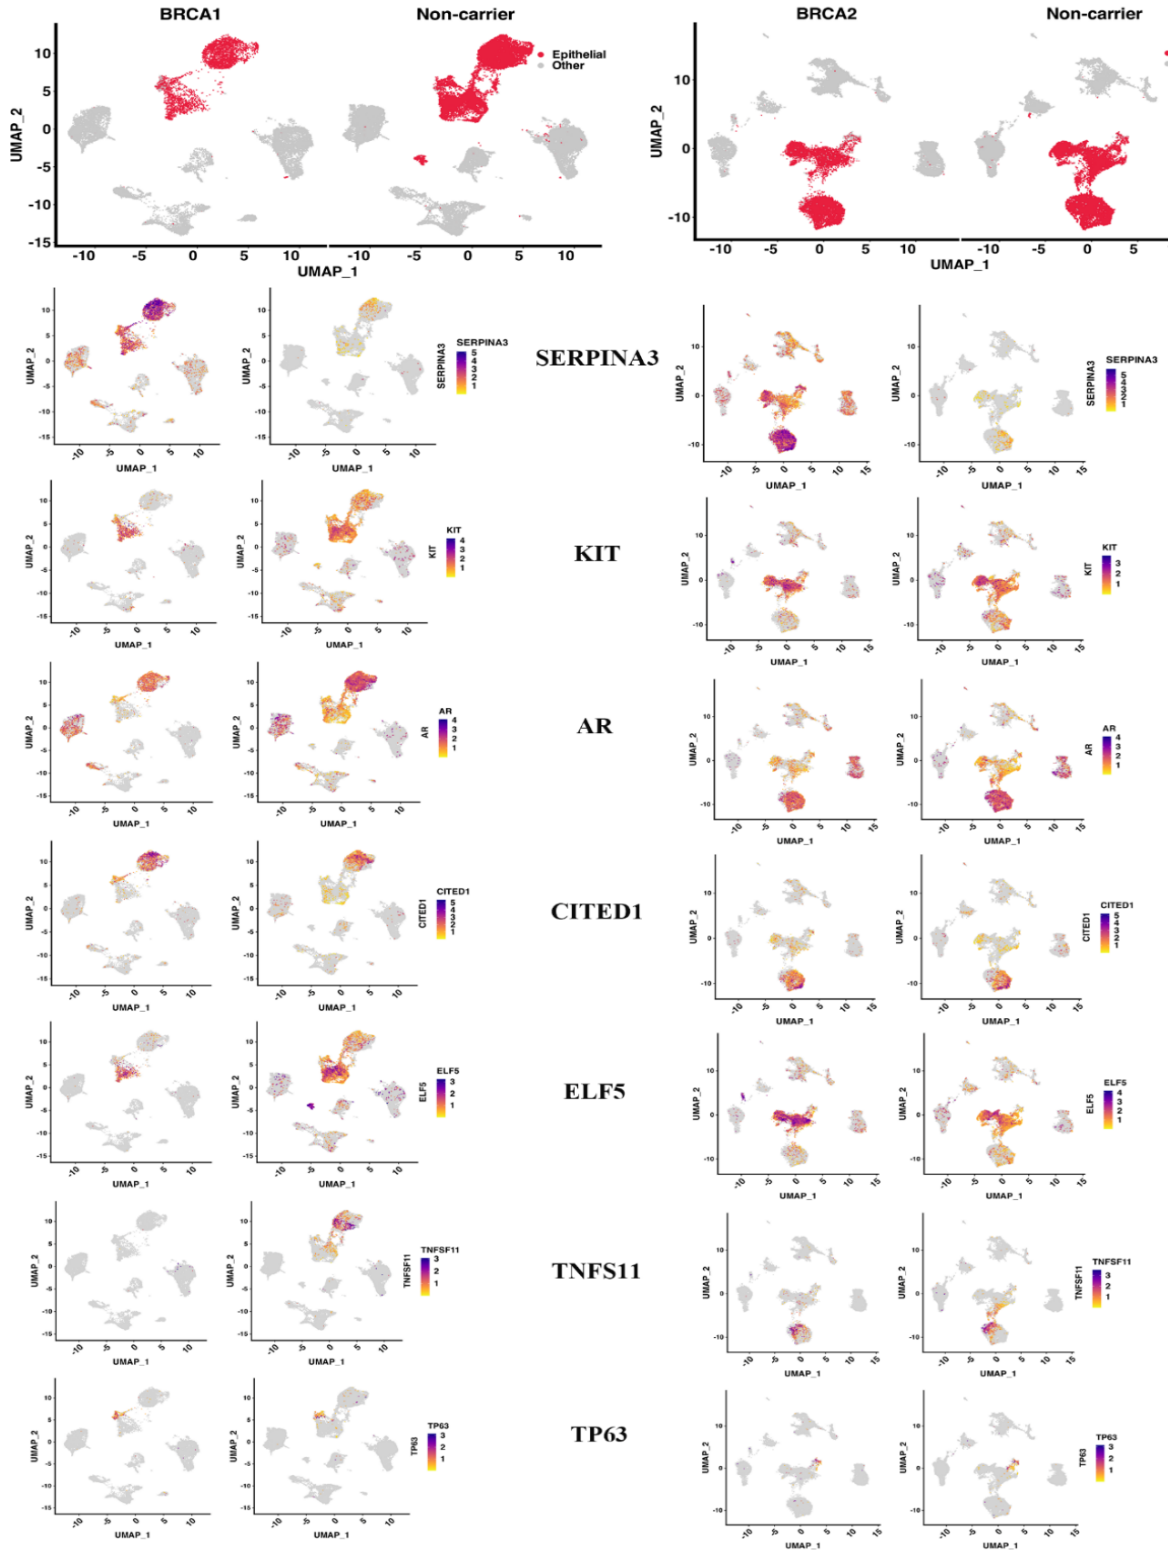

**Figure S1: Expression patterns of several epithelial cells enriched/specific genes in BRCA1 or BRCA2 mutation carriers compared to non-carrier. KIT, ELF5, and TP63 expressing cells are considered to represent luminal progenitor/LASP, alveolar and basal cells, respectively.**
