# Supplementary material for: Signaling Pathway Alterations Driven by BRCA1 and BRCA2 Germline Mutations are Sufficient to Initiate Breast Tumorigenesis by the PIK3CAH1047R Oncogene
Source: PubMed Central journal article supplement (PMC10774565; doi:10.1158/2767-9764.crc-23-0330), 2024-01-05
Supplement: crc-23-0330-s02.pdf [file crc-23-0330-s02.pdf]

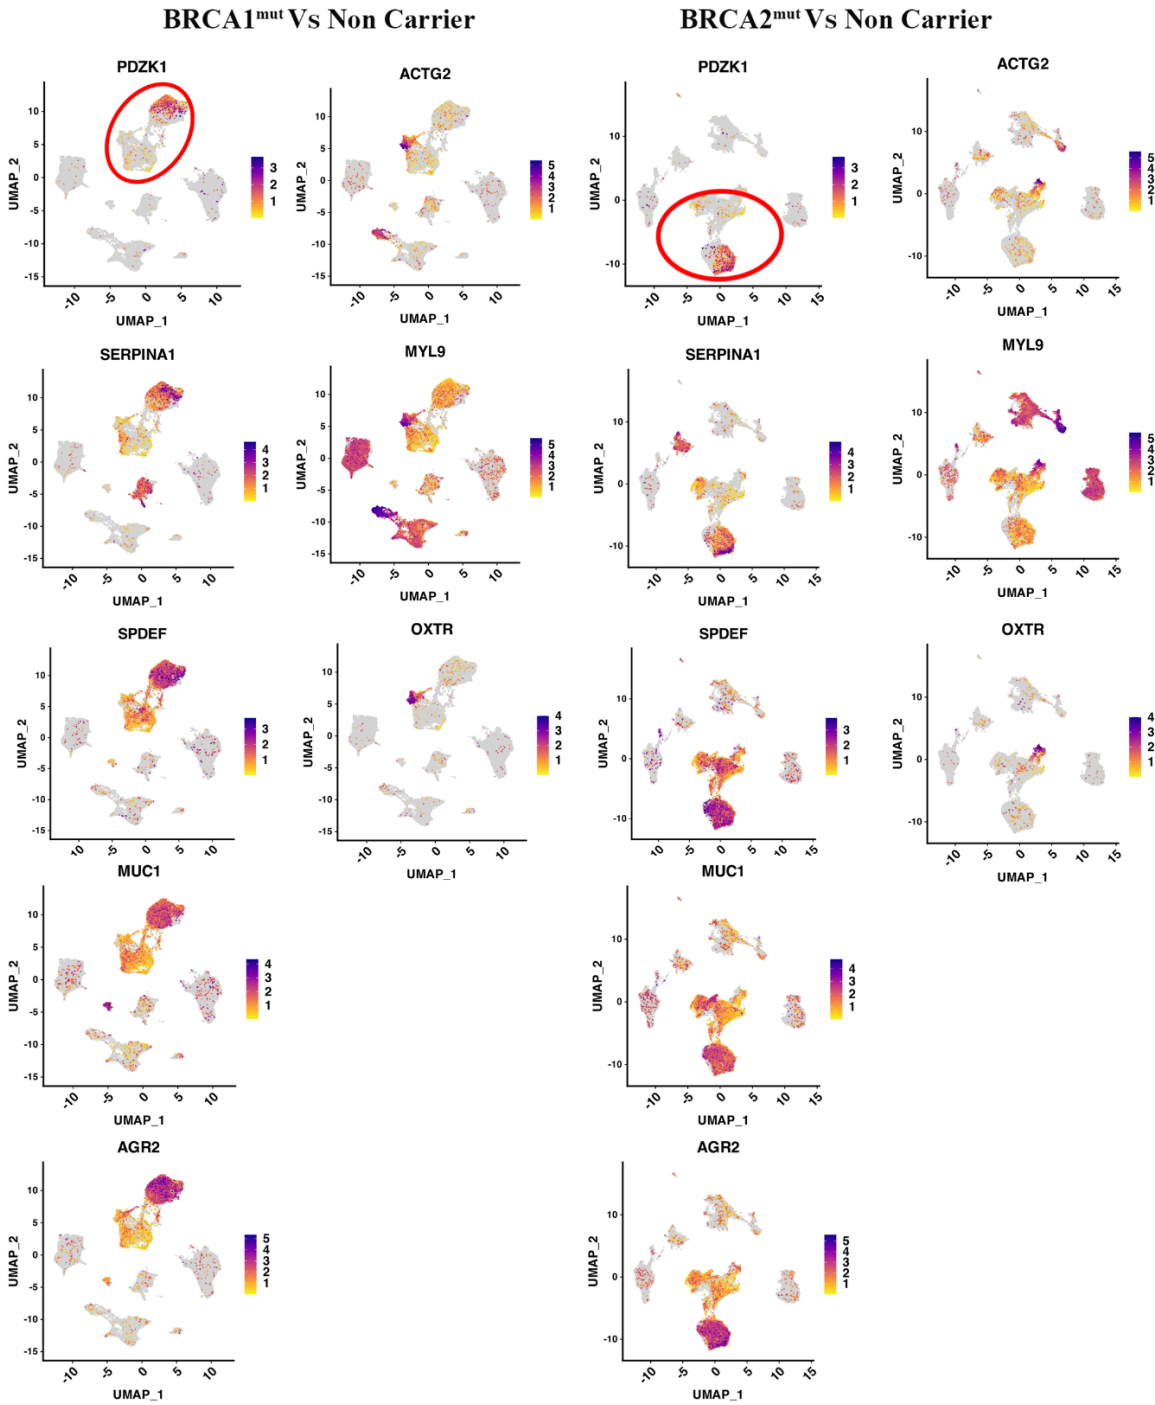

**Figure S2: Expression differences of select ER $\alpha$ -responsive and hormone sensitive cell marker genes in BRCA1 or BRCA2 mutation carriers compared to non-carriers. SERPNA1, PDZK1 and SPDEF are ER $\alpha$  target genes, whereas ARG2 and MUC1 and SERPNA1 are markers of hormone responsive genes.**
