# Supplementary material for: Signaling Pathway Alterations Driven by BRCA1 and BRCA2 Germline Mutations are Sufficient to Initiate Breast Tumorigenesis by the PIK3CAH1047R Oncogene
Source: PubMed Central journal article supplement (PMC10774565; doi:10.1158/2767-9764.crc-23-0330), 2024-01-05
Supplement: crc-23-0330-s03.pdf [file crc-23-0330-s03.pdf]

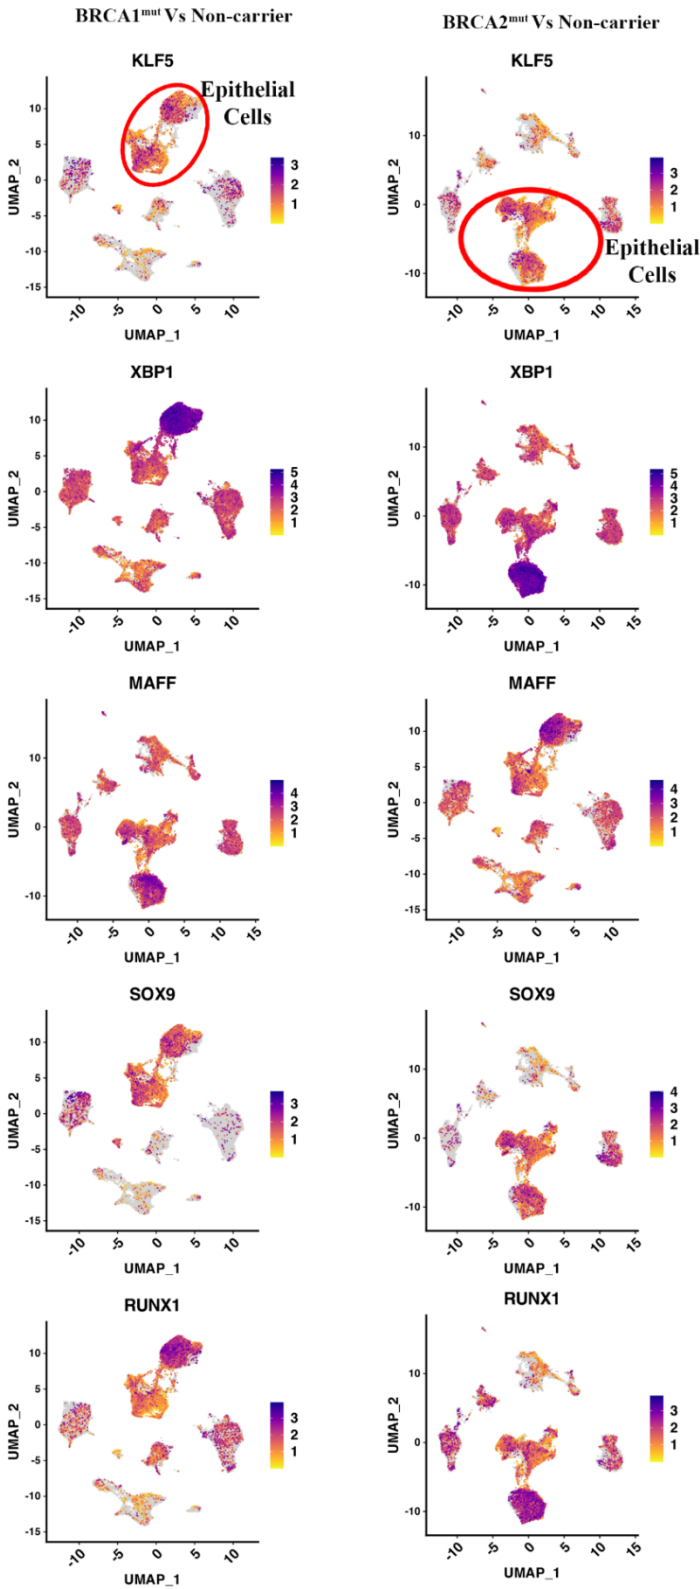

**Figure S3: Expression levels of top transcription regulators in major epithelial subclusters (mature luminal/LHS, luminal progenitors/LASP and basal/BM cells).** Transcription regulators described by Kumar et al in their Extended Figure 1 (see reference below) were evaluated in our data set and only those that showed difference in expression are shown. KLF5 (luminal progenitor/luminal secretory), XBP1 (mature luminal/luminal hormonal), MAFF (basal), SOX9, (luminal progenitor/luminal secretory), RUNX1 (mature luminal/luminal hormonal) showed variability in expression between BRCA1/2 mutant carriers compared to non-carriers with highest difference in XBP1 expression.

\*Kumar T, Nee K, Wei R, et al. A spatially resolved single-cell genomic atlas of the adult human breast. Nature 2023; 620:181-191.
