# Supplementary material for: Signaling Pathway Alterations Driven by BRCA1 and BRCA2 Germline Mutations are Sufficient to Initiate Breast Tumorigenesis by the PIK3CAH1047R Oncogene
Source: PubMed Central journal article supplement (PMC10774565; doi:10.1158/2767-9764.crc-23-0330), 2024-01-05
Supplement: crc-23-0330-s04.pdf [file crc-23-0330-s04.pdf]

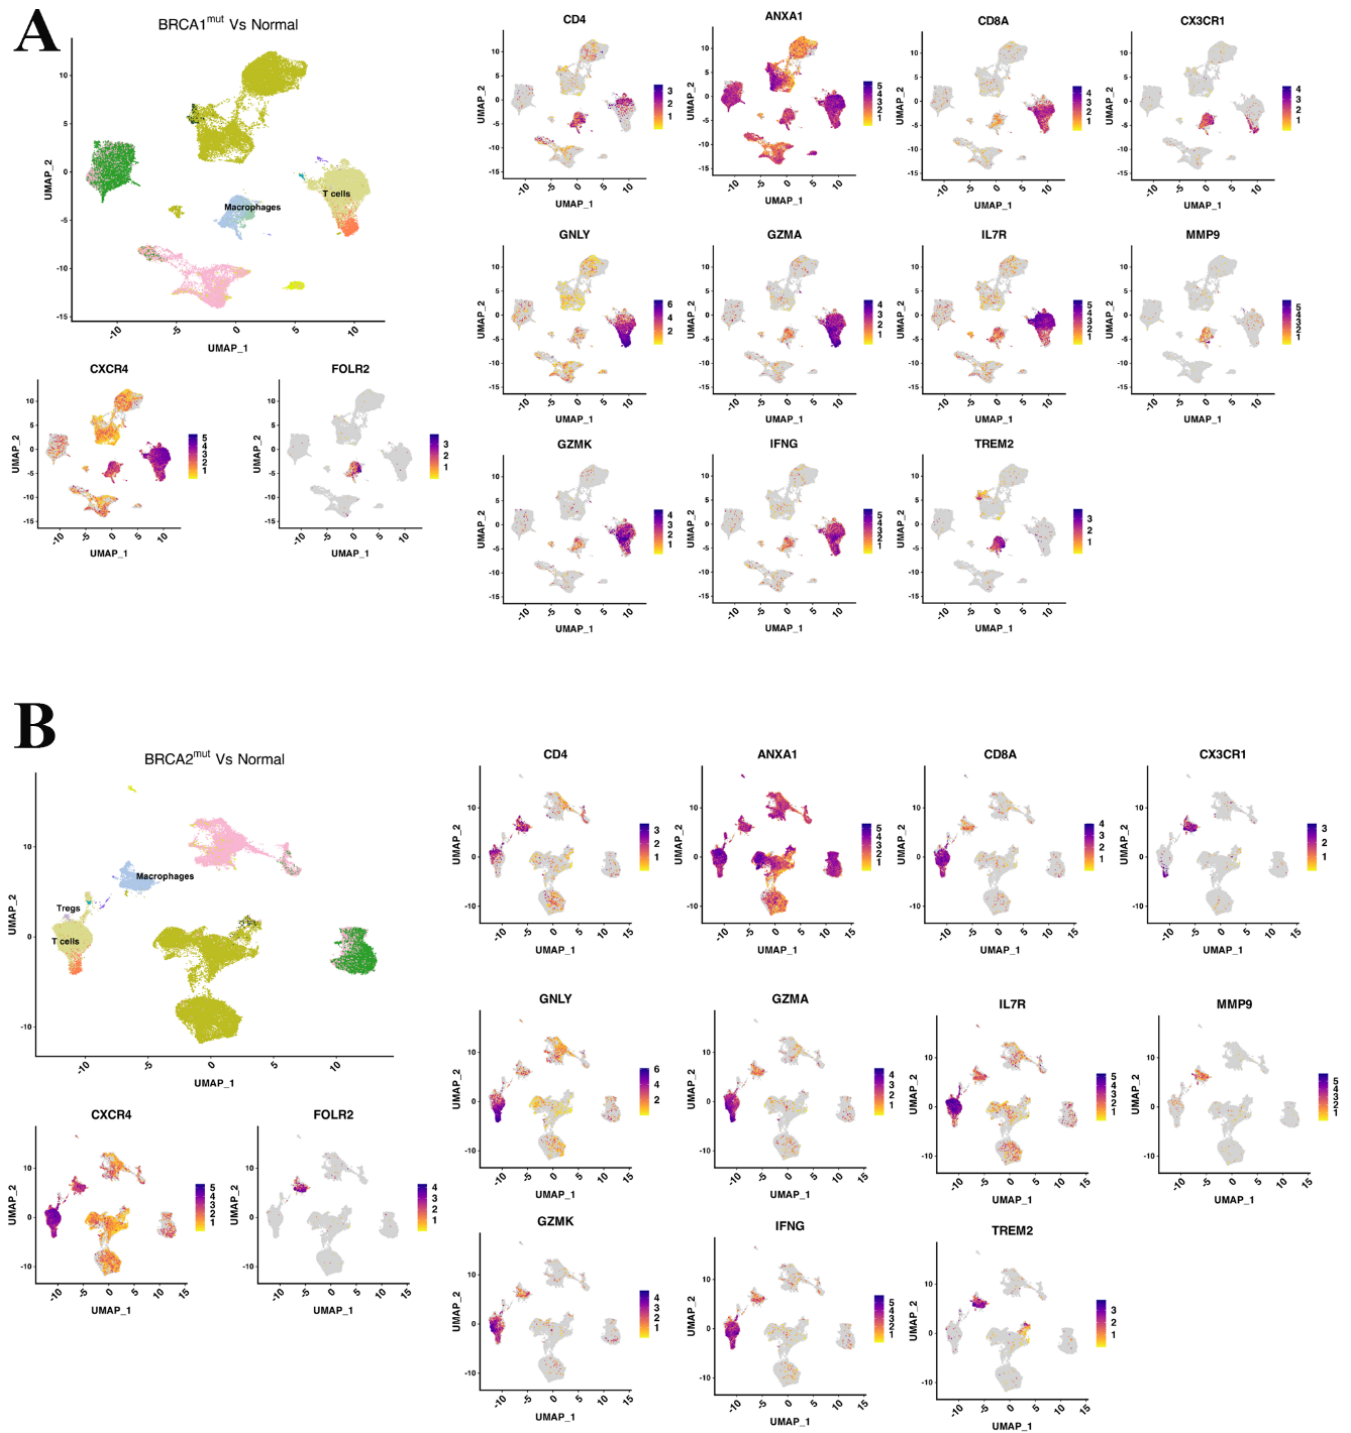

**Figure S4: Expression pattern of T cells and macrophage associated genes in BRCA1 or BRCA2 mutation carriers compared to non-carriers. Cell cluster identity depicted in Figure 5 of the main manuscript is reproduced here to allow proper assessment of results.**
