# Supplementary material for: Signaling Pathway Alterations Driven by BRCA1 and BRCA2 Germline Mutations are Sufficient to Initiate Breast Tumorigenesis by the PIK3CAH1047R Oncogene
Source: PubMed Central journal article supplement (PMC10774565; doi:10.1158/2767-9764.crc-23-0330), 2024-01-05
Supplement: crc-23-0330-s05.pdf [file crc-23-0330-s05.pdf]

**Table S1:** Information on samples used for single cell studies. All tissues are taken at the time of surgery as a part of treatment. Samples 1-4 are BRCA1 and 5-8 are BRCA2. In case of sample 4, tissues from left and right breasts were sequenced separately.

| Case # | Age | Race  | Source                     | Histology | Diagnosis Treatment                                                                                        | Mutation                                 |
|--------|-----|-------|----------------------------|-----------|------------------------------------------------------------------------------------------------------------|------------------------------------------|
| 1      | 33  | White | Normal-adjacent            | Normal    | Diagnosed with inflammatory breast cancer                                                                  | Exon 18 c.5165C>T (p.Ser1722Phe)         |
| 2      | 37  | White | Normal-adjacent            | Normal    | History of Triple negative breast cancer                                                                   | c.213-11T>G                              |
| 3      | 33  | White | Contralateral              | Normal    | Fibrocystic and ductal hyperplasia, preoperative chemo                                                     | c.181T>G (pCys61Gly)                     |
| 4      | 45  | Black | Normal adjacent and Normal | Normal    | Stage I TNBC (T1cN0), partial mastectomy followed by chemo. Prophylactic surgery three months after chemo. | deletion of exon 23, heterozygous        |
| 5      | 42  | White | Normal-adjacent            | Normal    | ER-/PR+ tumor                                                                                              | c8168A>G(pAsp2723Gly), heterozygous      |
| 6      | 67  | White | Normal                     | Normal    | ER+ tumor 20 years before bilateral mastectomy                                                             | c1813dupA (pIle605Asnfs*11) heterozygous |
| 7      | 42  | Black | Normal-adjacent            | Normal    | Metaplastic squamous cell carcinoma-TNBC. Prior chemotherapy                                               | c.658_659deIGT                           |
| 8      | 39  | White | Normal-prophylactic        | Normal    | Fibrocystic changes and fibro adenomas                                                                     | deletion of exon 7, heterozygous         |
