# Supplementary material for: Signaling Pathway Alterations Driven by BRCA1 and BRCA2 Germline Mutations are Sufficient to Initiate Breast Tumorigenesis by the PIK3CAH1047R Oncogene
Source: PubMed Central journal article supplement (PMC10774565; doi:10.1158/2767-9764.crc-23-0330), 2024-01-05
Supplement: crc-23-0330-s06.pdf [file crc-23-0330-s06.pdf]

**Table S2: Number and percentage of different cell types in different tissue types used in this study. CLP= Common Lymphoid Progenitor, ND= not detected**

| <b>Cell type</b>         | <b>Non-carrier</b> | <b>BRCA1</b> | <b>BRCA2</b>  |
|--------------------------|--------------------|--------------|---------------|
| <b>Epithelial cells</b>  | 15577 (42.3%)      | 3670 (21.3%) | 10498 (41.9%) |
| <b>Endothelial cells</b> | 446 (1.2%)         | 605 (3.5%)   | 214 (0.9%)    |
| <b>Fibroblasts</b>       | 4559 (12.4%)       | 2537 (14.7%) | 2074 (8.3%)   |
| <b>Adipocytes</b>        | 5986 (15.3%)       | 4397 (25.5%) | 9067 (36.2%)  |
| <b>T cells</b>           | 6217 (16.9%)       | 3788 (22%)   | 2023 (8.1%)   |
| <b>Monocytes</b>         | 2024 (5.5%)        | 568 (3.3%)   | 623 (2.5%)    |
| <b>Macrophages</b>       | 860 (2.3%)         | 199 (1.2%)   | 0 (0%)        |
| <b>NK cells</b>          | 891 (2.4%)         | 784 (4.6%)   | 277 (1.1%)    |
| <b>Keratinocytes</b>     | 34 (0.1%)          | 386 (2.2%)   | 172 (0.7%)    |
| <b>Plasma cells</b>      | 69 (0.2%)          | 40 (0.2%)    | 17 (0.1%)     |
| <b>B cells</b>           | 115 (0.3%)         | 31 (0.2%)    | 8 (0.03%)     |
| <b>CLP</b>               | 24 (0.1%)          | 18 (0.1%)    | ND            |
